# Supplementary material for: Socioeconomic determinants of the biology and outcomes of acute lymphoblastic leukemia in adults
Source: PubMed Central journal article supplement — Blood Adv. 2023 Dec 2;8(1):164–71. doi: 10.1182/bloodadvances.2023011862 (PMC10787242; doi:10.1182/bloodadvances.2023011862), 2023-12-02
Supplement: BLOODA_ADV-2023-011862-mmc1.pdf [file BLOODA_ADV-2023-011862-mmc1.pdf]

**Supplementary Figure 1**

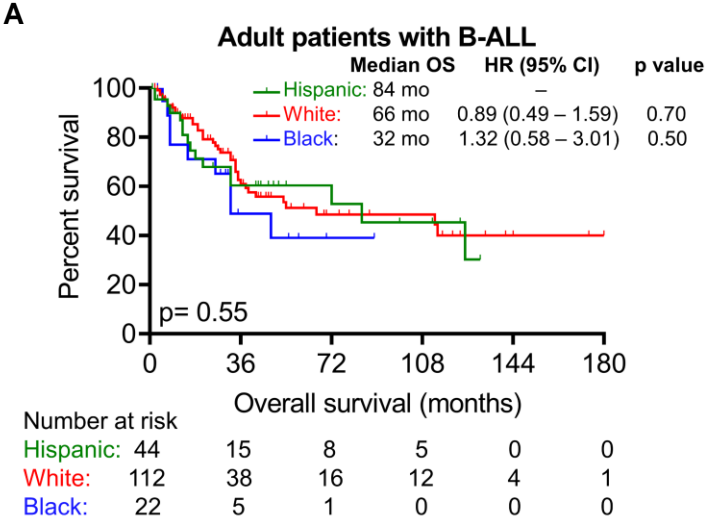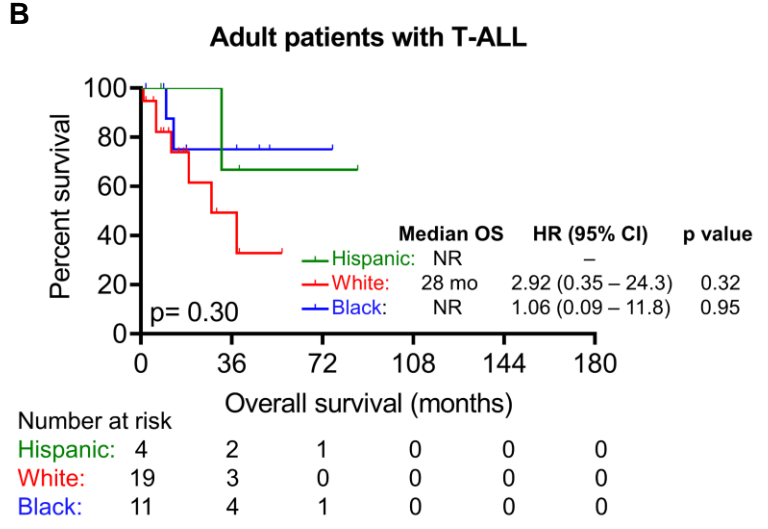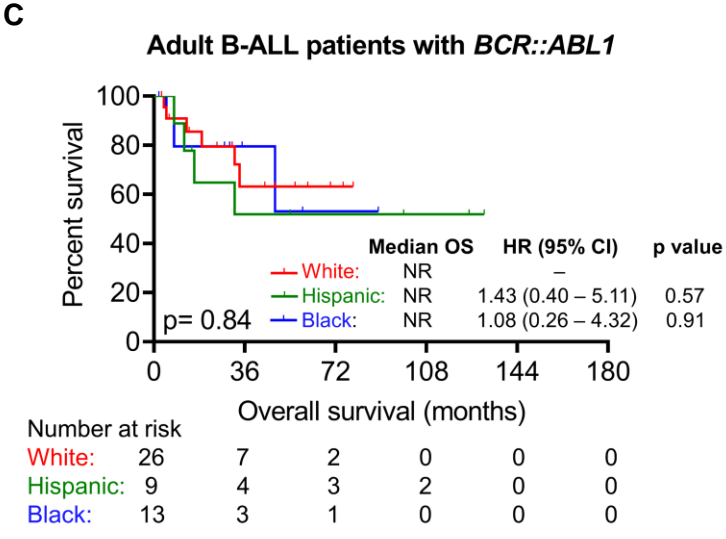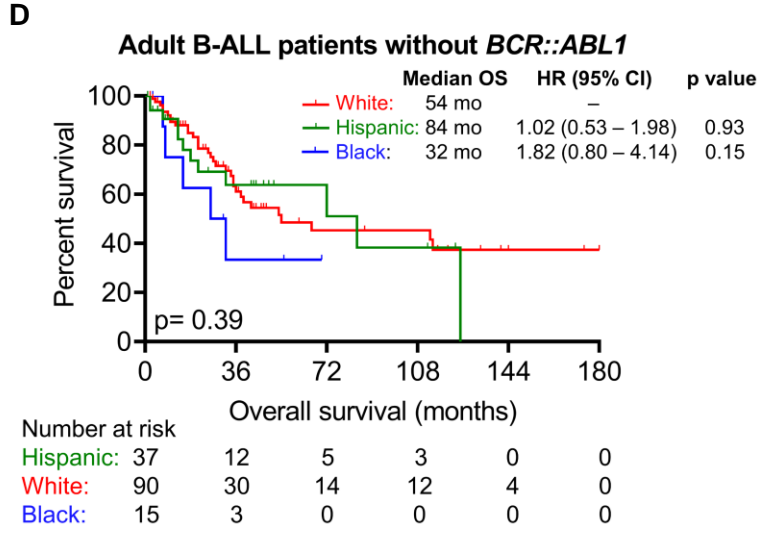

**Supplementary Figure 2**

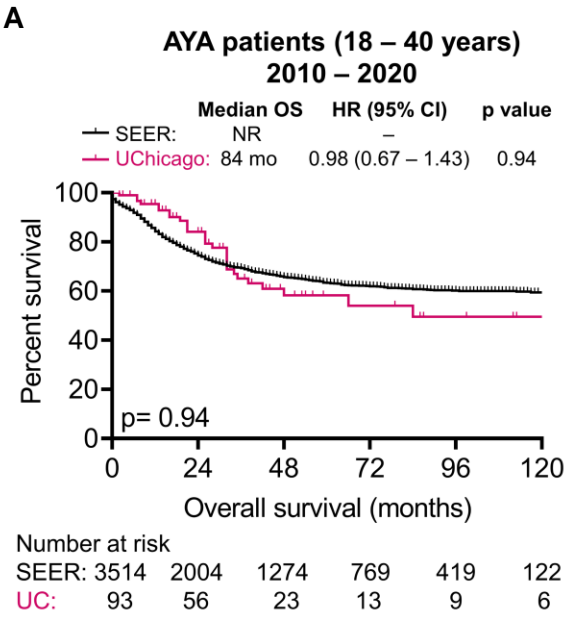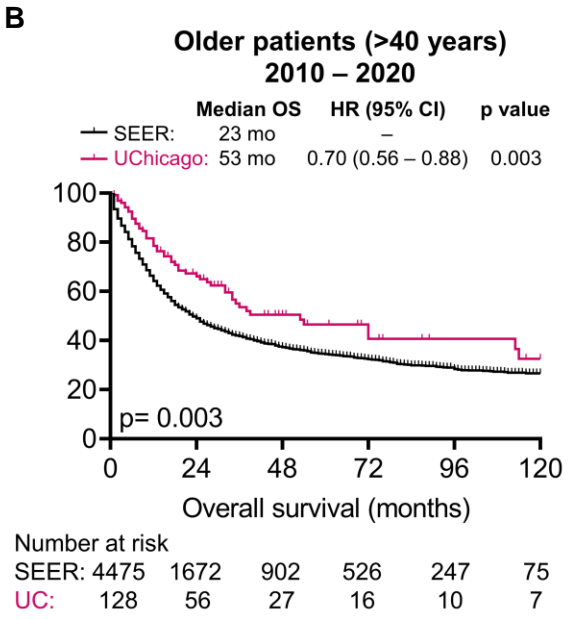

**Supplementary Table 1**

**UChicago B-ALL patients (n= 178)**

|                         | <b>N</b> | <b>NHW (n= 112)</b> | <b>Hispanic (n= 44)</b> | <b>NHB (n= 22)</b> |
|-------------------------|----------|---------------------|-------------------------|--------------------|
| <b>Inotuzumab</b>       | 37       | 23 (20.5)           | 10 (22.7)               | 4 (18.1)           |
| <b>Blinatumomab</b>     | 36       | 25 (22.3)           | 9 (20.4)                | 2 (9)              |
| <b>Cellular therapy</b> | 42       | 27 (24.1)           | 12 (27.2)               | 3 (7.1)            |
